## CORRECTION

# Correction: Hafting of Middle Paleolithic tools in Latium (central Italy): New data from Fossellone and Sant'Agostino caves

The *PLOS ONE* Staff

## Notice of Republication

An incorrect version of Fig 1 was published in error. Additionally, a Supporting Information file was incorrectly included in the originally published article. The publisher apologizes for these errors. This article was republished on September 27, 2019 to correct for these errors. Please download this article again to view the correct version.

## Reference

1. Degano I, Soriano S, Villa P, Pollarolo L, Lucejko JJ, Jacobs Z, et al. (2019) Hafting of Middle Paleolithic tools in Latium (central Italy): New data from Fossellone and Sant'Agostino caves. *PLoS ONE* 14(6): e0213473. <https://doi.org/10.1371/journal.pone.0213473> PMID: 31220106

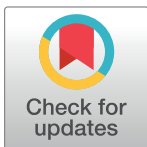

## OPEN ACCESS

**Citation:** The *PLOS ONE* Staff (2019) Correction: Hafting of Middle Paleolithic tools in Latium (central Italy): New data from Fossellone and Sant'Agostino caves. *PLoS ONE* 14(10): e0223714. <https://doi.org/10.1371/journal.pone.0223714>

**Published:** October 3, 2019

**Copyright:** © 2019 The PLOS ONE Staff. This is an open access article distributed under the terms of the [Creative Commons Attribution License](https://creativecommons.org/licenses/by/4.0/), which permits unrestricted use, distribution, and reproduction in any medium, provided the original author and source are credited.
